# Supplementary material for: Microbiome re-colonization dynamics of a moving bed biofilter in an Atlantic salmon recirculating aquaculture system.
Source: Research Square preprint supplement (doi:10.21203/rs.3.rs-5853176/v1), 2025-01-31
Supplement: Supplementary file 2 [file 19e4b4ae34e9239b9cd2f31c.xlsx]

## Sheet: Hoja 1 - Supplementary Excel Sp
Supplementary Excel Spreadsheets N_1 (1)
	ASV101	ASV104	ASV105	ASV1059	ASV106	ASV11	ASV1183	ASV1184	ASV12	ASV1212	ASV122	ASV1237	ASV1306	ASV131	ASV1340	ASV136	ASV1388	ASV14	ASV144	ASV1440	ASV145	ASV1464	ASV147	ASV15	ASV1513	ASV1516	ASV154	ASV1568	ASV1592	ASV16	ASV165	ASV166	ASV17	ASV173	ASV175	ASV176	ASV177	ASV195	ASV2	ASV206	ASV21	ASV210	ASV212	ASV218	ASV22	ASV220	ASV227	ASV228	ASV233
7792_3	0	0	5	0	0	0	0	0	0	0	0	0	0	162	0	0	0	0	296	0	0	0	10	2254	0	0	0	0	0	0	0	0	3	0	0	0	0	4	3234	0	2	0	0	0	0	0	0	0	0
7792_4	0	0	3	0	3	0	0	0	0	0	0	0	0	306	0	0	0	0	645	0	0	0	21	3874	0	0	0	0	0	8	0	0	14	0	0	0	0	0	5588	0	9	0	0	0	11	0	0	0	0
7792_5	0	13	5	0	3	6	0	0	0	0	0	0	0	309	0	0	0	0	584	0	0	0	52	3501	0	0	0	0	2	9	0	0	26	0	0	0	0	10	5718	0	9	0	0	0	12	3	0	0	0
7792_6	0	152	39	0	114	879	0	0	0	0	23	0	0	46	0	0	0	22	58	0	0	0	41	554	0	0	19	0	0	509	0	47	85	43	6	0	0	68	1685	0	154	0	7	18	189	120	0	0	0
7792_7	25	307	63	5	193	1883	0	0	0	0	39	0	0	84	0	0	0	22	119	0	0	0	86	982	0	0	23	0	0	921	0	85	191	92	4	0	0	147	2896	0	319	0	23	22	379	179	0	0	0
7792_8	30	372	41	10	342	1233	0	0	0	0	0	10	0	49	6	0	5	11	49	4	0	0	39	506	3	3	9	0	0	617	0	61	90	43	4	0	0	121	2552	34	526	0	23	20	519	66	0	14	0
7858_3	0	15	21	0	0	16	0	0	7	0	0	0	0	0	0	0	0	21	164	0	5	0	0	1024	0	0	6	0	0	12	0	0	13	0	0	0	0	18	4681	8	12	0	0	0	13	0	37	0	0
7858_4	0	5	29	0	10	71	0	0	11	0	0	0	0	0	0	0	0	29	232	0	5	0	0	1329	0	0	11	0	0	11	0	0	42	7	0	0	0	29	5743	15	7	0	0	0	17	0	37	0	0
7858_5	0	9	36	0	2	45	0	0	13	0	18	0	0	0	0	0	0	29	332	0	3	0	31	1919	0	0	0	0	0	5	0	0	14	5	4	0	0	13	6157	12	0	0	0	0	7	0	58	0	0
7858_6	45	214	106	0	97	1076	6	4	38	7	20	0	0	20	0	6	0	586	26	0	43	0	30	724	0	0	15	0	0	307	0	43	144	32	22	0	0	175	3359	93	187	0	19	11	370	5	24	9	22
7858_7	93	448	216	0	206	3241	0	4	145	0	71	0	0	0	0	31	0	673	65	0	15	0	35	521	0	0	71	0	0	854	12	88	492	90	25	5	67	165	2944	155	284	0	72	25	662	40	5	8	17
7858_8	131	72	62	0	0	328	0	2	69	2	16	0	0	0	0	0	0	152	7	0	6	2	137	307	0	0	19	0	0	154	21	0	79	17	21	13	0	11	6752	93	40	0	0	0	33	0	241	0	17
7929_2	0	3	4	0	10	52	0	0	10	0	0	0	0	3	0	19	0	32	12	0	0	0	0	887	0	0	12	0	0	9	0	0	206	0	4	0	12	0	5760	0	9	0	0	0	26	0	19	0	6
7929_3	0	0	3	0	10	106	0	0	25	0	5	0	0	10	0	25	0	67	15	0	0	0	0	1773	0	0	9	0	0	27	0	29	420	0	6	0	33	5	3733	15	63	0	0	0	32	0	35	0	0
7929_4	8	3	6	0	7	134	0	0	27	0	0	0	0	0	0	12	0	66	5	0	0	0	0	2225	0	0	14	0	0	24	0	0	433	3	7	0	0	9	4084	5	15	0	3	0	29	0	50	0	9
7929_5	24	96	26	3	133	1220	0	0	116	0	31	0	0	27	0	91	0	355	16	0	0	0	0	369	0	0	65	0	0	1437	0	46	714	100	21	0	56	68	272	12	118	0	69	28	615	19	0	21	14
7929_6	9	7	19	0	59	401	0	0	727	0	65	0	0	0	0	47	0	1218	0	0	14	0	0	411	0	0	45	0	0	58	0	39	2316	11	4	0	32	4	43	13	83	0	31	16	202	5	0	0	46
7929_7	24	37	85	0	105	877	0	0	1992	0	96	0	7	15	0	44	0	1091	0	0	10	0	0	296	0	0	94	0	0	140	0	0	1749	24	20	0	20	8	77	19	51	0	46	15	281	0	6	4	167
7986_10	28	31	21	0	89	1361	0	0	972	0	91	0	0	0	0	104	0	369	17	0	84	0	0	572	0	0	24	0	0	279	0	21	292	28	13	16	84	32	138	0	580	4	61	22	476	9	15	5	13
7986_11	34	27	55	0	34	1073	0	0	1271	0	45	0	0	13	0	62	0	183	18	0	77	0	0	684	0	0	24	0	0	298	0	0	143	24	18	8	73	23	136	0	303	0	38	0	160	0	18	20	9
7986_6	0	27	18	0	68	819	0	0	346	0	43	0	0	0	0	35	0	226	0	0	59	0	0	176	0	0	25	0	0	277	10	33	161	42	4	10	25	24	57	0	215	0	65	23	581	11	0	7	9
7986_7	0	31	15	0	49	801	0	0	375	0	33	0	0	7	0	37	0	208	17	0	42	0	0	323	0	0	35	0	0	301	0	20	138	43	6	11	28	64	127	0	461	0	18	22	348	0	6	14	12
7986_8	36	35	93	0	60	1697	0	0	1401	0	70	0	0	0	0	134	0	209	35	0	144	0	0	1081	0	0	57	0	0	456	0	30	193	31	32	17	120	71	281	6	430	0	73	8	305	5	9	17	20
7986_9	35	36	22	0	100	1492	4	0	743	0	96	0	0	0	0	70	0	438	20	0	62	2	0	543	0	0	44	0	0	359	54	26	146	27	12	30	63	52	154	17	559	0	59	31	601	6	0	11	28
8035_2	8	0	0	0	0	17	0	0	15	0	0	0	0	0	0	0	0	12	35	0	9	0	97	1314	0	0	2	0	0	0	0	0	3	2	6	2	0	0	1487	0	8	10	2	0	0	0	0	0	0
8035_3	0	0	0	0	0	39	0	0	11	0	5	0	0	0	0	0	0	10	27	0	0	0	62	1853	0	0	0	0	0	4	5	0	12	0	3	0	0	0	1745	0	12	6	0	0	2	0	0	3	0
8035_4	0	0	0	0	0	44	0	0	15	0	7	0	0	0	0	16	0	26	25	0	10	0	126	1526	0	0	0	0	0	0	0	0	8	0	6	3	0	0	1782	0	12	15	2	2	8	0	0	5	5
8035_5	144	51	30	0	42	1390	0	0	125	0	127	0	0	0	0	21	0	348	0	0	27	0	86	60	0	0	29	3	0	361	22	49	65	25	109	22	0	28	173	8	72	65	77	86	172	29	0	87	8
8035_6	253	54	71	0	35	1771	0	0	427	0	180	0	3	0	0	91	0	512	19	0	68	0	139	404	0	0	39	0	0	515	19	31	216	42	129	37	27	30	406	0	271	92	64	28	194	8	0	72	23
8035_7	212	72	34	0	47	1557	0	0	311	0	150	0	0	0	0	57	0	534	0	0	64	0	199	134	0	0	38	0	0	314	29	16	259	33	87	47	29	29	270	10	524	192	75	82	247	11	0	84	22
8110_2	0	0	10	0	0	202	0	0	13	0	16	0	0	0	0	10	0	39	5	0	10	0	14	1755	0	0	6	0	0	15	147	0	7	0	8	36	13	0	1462	0	87	9	0	3	36	0	37	4	0
8110_3	23	3	15	0	0	147	0	0	19	0	24	0	0	0	0	12	0	72	0	0	18	0	15	2377	0	0	5	0	0	20	81	0	14	0	9	20	0	5	1524	13	149	13	0	0	20	0	31	3	0
8110_4	29	0	14	0	0	269	0	0	22	0	26	0	0	0	0	0	0	53	8	0	22	0	42	3110	0	0	12	0	0	7	168	0	10	0	13	47	20	0	1268	0	128	19	0	0	10	0	76	0	0
8110_5	81	39	42	0	25	1189	0	0	41	0	108	0	0	0	0	23	0	272	4	0	10	0	16	185	0	0	25	0	0	429	74	26	61	33	29	74	0	22	171	0	146	16	53	26	343	0	0	42	0
8110_6	68	32	35	0	40	1061	0	0	56	0	132	0	0	0	0	33	0	185	0	0	27	0	18	218	0	0	18	0	0	321	68	27	36	31	22	76	0	31	132	12	276	34	16	26	356	0	0	45	0
8110_7	186	55	152	0	29	2402	0	0	279	0	355	0	0	0	0	50	0	412	16	0	76	0	78	562	0	0	42	0	0	434	276	36	140	20	70	238	0	12	170	23	317	75	18	7	400	3	7	53	34
[truncated: 60 more columns]
